# Supplementary material
Source: publisher figshare collection journal article supplement (https://acs.figshare.com/ndownloader/files/9393910)
Supplement: Supplementary file 1 [file 9393910]

# Analysis of costs and timeframe for reducing CO<sub>2</sub> emissions by 70% in the U.S. auto and energy sectors by 2050

*Sarang D. Supekar<sup>†</sup>, Steven J. Skerlos<sup>\*,†,‡</sup>*

<sup>†</sup>Department of Mechanical Engineering, University of Michigan, Ann Arbor, MI 48109, United States

<sup>‡</sup>Department of Civil and Environmental Engineering, University of Michigan, Ann Arbor, MI 48109, United States

Pages S1 – S28

Figures S1 – S6

Tables S1 – S4

---

**\*Corresponding author.** Address: 3001F EECS, 1301 Beal Avenue, Ann Arbor, MI 48109-2122, USA. Phone: (734) 615-5253. Fax: (734) 647-3170. Email: skerlos@umich.edu

## Table of Contents

|                                                                             |           |
|-----------------------------------------------------------------------------|-----------|
| <b>U.S. GREENHOUSE GAS INVENTORY .....</b>                                  | <b>4</b>  |
| <b>MATHEMATICAL FORMULATION OF THE MODEL .....</b>                          | <b>4</b>  |
| SETS .....                                                                  | 4         |
| INPUTS .....                                                                | 5         |
| DECISION VARIABLES .....                                                    | 7         |
| OBJECTIVE FUNCTION .....                                                    | 7         |
| CONSTRAINTS .....                                                           | 8         |
| <i>Fleet Constraints</i> .....                                              | 8         |
| <i>Emission Constraints</i> .....                                           | 11        |
| <i>Other Constraints</i> .....                                              | 14        |
| <i>Non-Negativity Bounds</i> .....                                          | 15        |
| <i>Uncertainty Analysis Scenarios</i> .....                                 | 15        |
| <b>INPUTS, ASSUMPTIONS, AND OTHER DETAILS FOR THE AUTO SECTOR .....</b>     | <b>16</b> |
| REPRESENTATIVE VEHICLE CHARACTERISTICS .....                                | 16        |
| INITIAL CONDITION FOR STOCK AND FLOW MODEL .....                            | 16        |
| DETAILS ON INPUT PARAMETERS, ASSUMPTIONS, AND DATA SOURCES .....            | 18        |
| <b>INPUTS, ASSUMPTIONS, AND OTHER DETAILS FOR THE ELECTRIC SECTOR .....</b> | <b>20</b> |
| INITIAL CONDITION FOR STOCK AND FLOW MODEL .....                            | 20        |
| DETAILS ON INPUT PARAMETERS, ASSUMPTIONS, AND DATA SOURCES .....            | 21        |
| <b>TECHNOLOGY TRAJECTORIES FOR NOMINAL SCENARIO .....</b>                   | <b>22</b> |
| <b>REFERENCES .....</b>                                                     | <b>26</b> |

## List of Figures

|                                                                                                                                                                                                                                                                                                                                                                                                                                                                                                          |    |
|----------------------------------------------------------------------------------------------------------------------------------------------------------------------------------------------------------------------------------------------------------------------------------------------------------------------------------------------------------------------------------------------------------------------------------------------------------------------------------------------------------|----|
| Fig. S1. Breakdown of U.S. greenhouse gas emissions by sector based on U.S. EPA data. <sup>1</sup><br>Bolded sectors, which contribute to just over 47% of all GHG emissions, are the subject of<br>this study.....                                                                                                                                                                                                                                                                                      | 4  |
| Fig. S2. Age-wise composition of initial (2014) vehicle stock for the auto sector stock and flow<br>model based on vehicle sales data and discard probability calculated in Eq. (S20).....                                                                                                                                                                                                                                                                                                               | 18 |
| Fig. S3. Age-wise composition of initial (2014) power generation capacity for the electric sector<br>stock and flow model based on NEEDS data. <sup>26</sup> .....                                                                                                                                                                                                                                                                                                                                       | 20 |
| Fig. S4. Ideal least-cost trajectories under climate action starting in 2018 for the nominal cost,<br>emissions, and demand scenario. (A) and (C) show new vehicle sales and new capacity<br>addition respectively for the auto and electric sectors, and total stock trajectories for the two<br>sectors are shown in (B) and (D). .....                                                                                                                                                                | 23 |
| Fig. S5. Ideal least-cost trajectories under business as usual case for the nominal cost, emissions,<br>and demand scenario. (A) and (C) show new vehicle sales and new capacity addition<br>respectively for the auto and electric sectors, and total stock trajectories for the two sectors<br>are shown in (B) and (D). .....                                                                                                                                                                         | 24 |
| Fig. S6. Comparison of business-as-usual (BAU) emission trajectories obtained using the<br>LETSACT model (solid green) with BAU emission trajectories projected in EIA's 2017<br>Annual Energy Outlook <sup>41</sup> (dashed red). Note that the initial difference of about 300 – 350<br>Mt CO <sub>2</sub> in the utility sector emissions between LETSACT results and the EIA reported<br>values is because the LETSACT model includes emissions from combined heat and power<br>plants as well. .... | 25 |

## List of Tables

|                                                                                                                                                                  |    |
|------------------------------------------------------------------------------------------------------------------------------------------------------------------|----|
| Table S1. Uncertainty analysis scenarios (27) defined by levels of different parameter groups.<br>For each parameter group, 1 = Low, 2 = Nominal, 3 = High. .... | 15 |
| Table S2. Representative vehicle characteristics for the auto sector.....                                                                                        | 16 |
| Table S3. Auto sector model inputs, assumptions, and data sources .....                                                                                          | 18 |
| Table S4. Electric sector model inputs, assumptions, and data sources .....                                                                                      | 21 |

# U.S. GREENHOUSE GAS INVENTORY

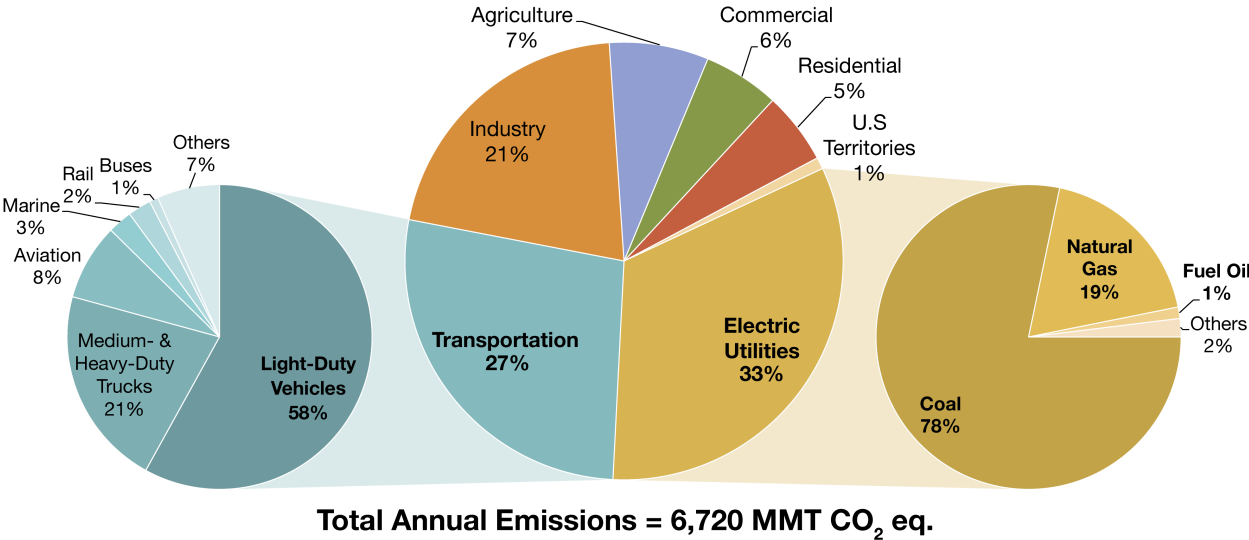

Fig. S1. Breakdown of U.S. greenhouse gas emissions by sector based on U.S. EPA data.<sup>1</sup> Bolded sectors, which contribute to just over 47% of all GHG emissions, are the subject of this study.

## MATHEMATICAL FORMULATION OF THE MODEL

### Sets

|                    |                                                                                                                                                                                                                                                                           |
|--------------------|---------------------------------------------------------------------------------------------------------------------------------------------------------------------------------------------------------------------------------------------------------------------------|
| $N_v$              | Set of vehicle technologies $\{ICEV, HEV, BEV, PHEV\}$ or Conventional Vehicle, Hybrid Electric Vehicle, Battery Electric Vehicle, Plug-in Hybrid Electric Vehicle.                                                                                                       |
| $N_e$              | Set of electric generation technologies $\{PC, NGGT, NGCC, P, B, N, H, W, SPV, STH, G\}$ or Pulverized Coal, Natural Gas (Gas Turbine), Natural Gas (Combined Cycle) Petroleum, Biomass, Nuclear, Hydroelectric, Wind, Solar Photovoltaic, Solar Thermal, and Geothermal. |
| $T$                | Set of ages for technologies. 0 implies a new technology unit.                                                                                                                                                                                                            |
| $Y$                | Set of years in the model are indexed from 0, ..., $ Y $ . Year 0 is 2014.                                                                                                                                                                                                |
| $N = N_v \cup N_e$ | Set of all technologies.                                                                                                                                                                                                                                                  |

20 **Inputs**

|    |                            |                                                                               |
|----|----------------------------|-------------------------------------------------------------------------------|
| 21 | $DEPLOYMENT\_COST(i,k)$    | Unit cost of purchasing or constructing one new unit of                       |
| 22 |                            | technology $i \in N$ in year $k \in Y$ .                                      |
| 23 | $MAINTENANCE\_COST(i,j,k)$ | Annual unit maintenance cost of technology $i \in N$ that is of               |
| 24 |                            | age $j \in T$ in year $k \in Y$ .                                             |
| 25 | $FUEL\_COST(i,k)$          | Cost per kg of fuel for technology $i \in N$ in year $k \in Y$ .              |
| 26 | $SCRAPPAGE\_VALUE(i,j,k)$  | Market value that owners of technology $i \in N$ stand to receive             |
| 27 |                            | when scrapping or decommissioning a unit of age $j \in T$ in                  |
| 28 |                            | year $k \in Y$ at the end of its life.                                        |
| 29 | $TAKE\_BACK\_VALUE(i,j,k)$ | Additional amount that owners of technology $i \in N$ stand to                |
| 30 |                            | receive when scrapping or decommissioning a unit of age                       |
| 31 |                            | $j \in T$ in year $k \in Y$ before the end of its typical maximum             |
| 32 |                            | service life.                                                                 |
| 33 | $D_v(k)$                   | Annual demand for vehicles miles traveled (VMT) in year                       |
| 34 |                            | $k \in Y$ .                                                                   |
| 35 | $D_e(k)$                   | Annual demand for MWh in year $k \in Y$ . This excludes the                   |
| 36 |                            | demand for electricity generated each year by <i>BEV</i> and <i>PHEV</i>      |
| 37 |                            | vehicles which is determined endogenously and added                           |
| 38 |                            | separately.                                                                   |
| 39 | $EN(i,j,k)$                | Annual electricity demand per vehicle of technology $i \in N$ of              |
| 40 |                            | age $j \in T$ in year $k \in Y$ . For technologies <i>ICEV</i> and <i>HEV</i> |
| 41 |                            | these will be 0 in all years and for all age vehicles.                        |
| 42 | $GEN_v(i,j,k)$             | Annual usage (miles traveled) for vehicle technology $i \in N_v$              |
| 43 |                            | for units of age $j \in T$ in year $k \in Y$ . Miles travelled per            |
| 44 |                            | vehicle is assumed to be constant for all technologies of all                 |
| 45 |                            | ages, and thus the variation in VMT is only due to changes in                 |
| 46 |                            | number of vehicles with time.                                                 |
| 47 | $GEN_e(i,j,k)$             | Annual electricity generation rate of unit of electric technology             |
| 48 |                            | $i \in N_e$ for units of age $j \in T$ in year $k \in Y$ measured in MWh.     |
| 49 | $CARBON\_INTENSITY(i)$     | Carbon intensity of fuel used in technology $i \in N$ (kg CO <sub>2</sub> /kg |
| 50 |                            | fuel)                                                                         |

|    |                             |                                                                                                                            |
|----|-----------------------------|----------------------------------------------------------------------------------------------------------------------------|
| 51 | $FUEL\_EFFICIENCY_s(i,j,k)$ | Quantity of fuel needed per mile (for $i \in N_v$ ) or per MWh (for                                                        |
| 52 |                             | $i \in N_e$ ) for a unit of age $j \in T$ in year $k \in Y$ . Note that $s$ refers to                                      |
| 53 |                             | the vehicle sector ( $v$ ) or the electric sector ( $e$ ).                                                                 |
| 54 | $c_{new_v}(i,k)$            | Unit purchase and operating cost of a vehicle of technology $i \in N_v$                                                    |
| 55 |                             | in year $k \in Y$ , defined as:                                                                                            |
| 56 |                             | $DEPLOYMENT\_COST(i,k) + MAINTENANCE\_COST(i,k) +$<br>$FUEL\_EFFICIENCY_v(i,k) \bullet GEN_v(i,k) \bullet FUEL\_COST(i,k)$ |
| 57 | $c_{old_v}(i,j,k)$          | Unit operating cost of an old (existing in the stock) technology                                                           |
| 58 |                             | $i \in N_v$ of age $j \in T$ in year $k \in Y$ , defined as:                                                               |
| 59 |                             | $MAINTENANCE\_COST(i,j,k) +$<br>$FUEL\_EFFICIENCY_v(i,j,k) \bullet GEN_v(i,j,k) \bullet FUEL\_COST(i,k)$                   |
| 60 | $c_{new_e}(i,k)$            | Unit construction and operating cost of a new unit of electric                                                             |
| 61 |                             | generation capacity of technology $i \in N_e$ in year $k \in Y$ , defined as:                                              |
| 62 |                             | $DEPLOYMENT\_COST(i,k) + MAINTENANCE\_COST(i,k) +$<br>$FUEL\_EFFICIENCY_e(i,k) \bullet GEN_e(i,k) \bullet FUEL\_COST(i,k)$ |
| 63 | $c_{old_e}(i,j,k)$          | Unit operating cost of an old technology $i \in N_e$ of age $j \in T$ in                                                   |
| 64 |                             | year $k \in Y$ , defined as:                                                                                               |
| 65 |                             | $MAINTENANCE\_COST(i,j,k) +$<br>$FUEL\_EFFICIENCY_e(i,j,k) \bullet GEN_e(i,j,k) \bullet FUEL\_COST(i,k)$                   |
| 66 | $c_{ret_s}(i,j,k)$          | Unit retirement cost of technology for sector $s$ (vehicle ( $v$ ) or                                                      |
| 67 |                             | energy ( $e$ )) where $i \in N_s$ of age $j \in T$ in year $k \in Y$ , defined as:                                         |
| 68 |                             | $SCRAPPAGE\_VALUE(i,j,k) + TAKE\_BACK\_VALUE(i,j,k)$                                                                       |
| 69 | $r$                         | Discount rate for net present value calculations, assumed as 7%.                                                           |
| 70 | $INITFLEET(i,j)$            | Initial number of units of technology $i \in N$ of age $j \in T$ .                                                         |
| 71 | $INITPROD_s$                | Initial production capacity in sector $s$ (vehicle ( $v$ ) or electric ( $e$ )).                                           |
| 72 | $P(i,j)$                    | Cumulative probability that a unit of technology $i \in N$ of age                                                          |
| 73 |                             | $j \in T$ will survive to the following year.                                                                              |

|    |                                                                                              |                                                                               |
|----|----------------------------------------------------------------------------------------------|-------------------------------------------------------------------------------|
| 74 | $Z_{low}(i,k), Z_{hi}(i,k)$                                                                  | Low and high allowable changes in the percent composition of                  |
| 75 |                                                                                              | technology $i \in N$ in year $k \in Y$ .                                      |
| 76 | $G_{low}(i,k), G_{hi}(i,k)$                                                                  | Low and high allowable changes in the percent composition of the              |
| 77 |                                                                                              | new deployment (new sales or new capacity addition) for                       |
| 78 |                                                                                              | technology $i \in N$ in year $k \in Y$ .                                      |
| 79 | $MARKET\_SHARE(i,k)$                                                                         | Upper bound on the total market share of technology $i \in N$ in year         |
| 80 |                                                                                              | $k \in Y$ .                                                                   |
| 81 | $e(i,j,k)$                                                                                   | Emission factor per unit of technology (new or old) $i \in N$ of age          |
| 82 |                                                                                              | $j \in T$ in year $k \in Y$ , defined as                                      |
| 83 |                                                                                              | $FUEL\_EFFICIENCY_s(i,j,k)$                                                   |
|    |                                                                                              | $\bullet GEN_s(i,j,k) \bullet CARBON\_INTENSITY(i)$                           |
| 84 |                                                                                              | where $s$ refers to either the vehicle ( $v$ ) or energy ( $e$ ) sectors      |
| 85 | $E_s(k)$                                                                                     | Emission target for sector $s$ in year $k \in Y$ in kg CO <sub>2</sub> /year. |
| 86 | $PROD\_GROWTH_s(k)$                                                                          | Production capacity growth rate in sector $s$ (vehicle ( $v$ ) or energy      |
| 87 |                                                                                              | ( $e$ )). This is the rate at which production capacity grows from year       |
| 88 |                                                                                              | 0 to year $k$ .                                                               |
| 89 | <b>Decision Variables</b>                                                                    |                                                                               |
| 90 | $new(i,k)$                                                                                   | Number of new units of technology $i \in N$ deployed in year $k \in Y$ .      |
| 91 | $old(i,j,k)$                                                                                 | Number of old or existing units of technology $i \in N$ of age $j \in T$      |
| 92 |                                                                                              | in existence in year $k \in Y$ .                                              |
| 93 | $ret(i,j,k)$                                                                                 | Number of units of technology $i \in N$ of age $j \in T$ retired in year      |
| 94 |                                                                                              | $k \in Y$ .                                                                   |
| 95 | <b>Objective Function</b>                                                                    |                                                                               |
| 96 | Based on the unit cost inputs and decision variables defined earlier, the net present value  |                                                                               |
| 97 | (NPV) objective function of the minimization problem for both sectors can then be written as |                                                                               |
| 98 | shown in Eq. (S1).                                                                           |                                                                               |

$$\begin{aligned}
& \min_{\substack{new \\ old \\ ret}} NPV = \sum_{k=1}^{|Y|} \frac{\left( \left( \sum_{i \in N} new(i,k) \cdot c_{new}(i,k) \right) + \left( \sum_{i \in N} \sum_{j=1}^{|T|} (old(i,j,k) \cdot c_{old}(i,j,k)) + (ret(i,j,k) \cdot c_{ret}(i,j,k)) \right) \right)}{(1+r)^{k-1}} \quad (S1)
\end{aligned}$$

This essentially translates to “minimize the net present value of all costs over the analysis time horizon by changing the number of new units sold, number of old units retired, and number of old units present in the fleet.” Note that the *FUEL\_EFFICIENCY* term in the definition of *c* includes any increase in fuel efficiency of a unit of a given technology type over time due to technological improvements, as well as the decrease in fuel efficiency with age of that unit. Also,  $c_{new}$  captures any trends in the deployment costs such as reduction in Lithium ion battery costs, and solar farm commissioning costs.

## Constraints

### Fleet Constraints

$$\forall k \in Y$$

$$\left\{ \sum new_v(i,k) \cdot GEN_v(i,k) \right\} + \left\{ \sum_{i \in N} \sum_{j=1}^{|T|} old_v(i,j,k) \cdot GEN_v(i,j,k) \right\} \geq D_v(k) \quad (S2)$$

The total demand constraint in the auto sector can be expressed as shown in Eq. (S2), and it essentially represents the total number of vehicle miles traveled as a function of time. The demand for electricity, expressed in MWh of generation, includes the demand from charging of electric vehicles. The demand from EV charging is endogenously calculated by running the electric and auto sector models iteratively, with EV charging emissions factors from one iteration (calculated as the generation-weighted average emissions per MWh in the electric sector) used in the subsequent iteration until the root mean square error of emission factors for all years over the

117 analysis time horizon (2015 – 2050) converges to less than 1% with respect to the previous  
 118 iteration.

$$\forall k \in Y$$

$$\begin{aligned} 119 \quad GEN_e(k) &= \left\{ \sum_{i \in N_e} \sum_{j=1}^{|T|} old_e(i, j, k) \right\} + \left\{ \sum_{i \in N_e} new_e(i, k) \right\} \\ &\geq D_e(k) + \left\{ \sum_{i \in N_v} \sum_{j=1}^{|T|} old_v(i, j, k) \cdot EN(i, j, k) \right\} + \left\{ \sum_{i \in N_e} new_v(i, k) \cdot EN(i, k) \right\} \end{aligned} \quad (S3)$$

120 In this study, the total population of the LDV sector fleet is assumed to grow at 1% annually,  
 121 with the miles traveled per year by a vehicle of any technology type and age remaining constant.  
 122 As such, the annual increase in VMT is assumed to be due to increase in number of vehicles  
 123 alone. The non-EV related demand in the electric sector is assumed to grow as projected in the  
 124 AEO 2015 report.<sup>2</sup>

125 The total market share of a given technology can be expressed as the ratio of the sum of old  
 126 and new units of that technology to the total number of units in the fleet. The model allows the  
 127 total market share of technologies to be constrained to restrict the manner in which new  
 128 technologies are introduced into the market or old technologies are phased out of the market.  
 129 These constraints are implemented by requiring that the *change* in total market shares of a  
 130 certain technology from the previous year be within the exogenously defined bounds of  $-Z_{low}$  and  
 131  $+Z_{hi}$ . The total market share constraints can be written as shown in Eq. (S4). Rollout of new  
 132 technologies and phasing out of old technologies can also be controlled by restricting the change  
 133 in new units deployed over the previous year to exogenously defined bounds of  $-G_{low}$  and  $+G_{hi}$   
 134 (Eq. (S5)). Together, these two approaches constitute the deployment smoothing constraints.

$$\forall i \in N, k \in Y$$

$$\begin{aligned} 135 \quad & \{1 - Z_{low}(i, k)\} \bullet \left\{ new(i, k-1) + \sum_{j=1}^{|T|} old(i, j, k-1) \right\} \\ & \leq new(i, k) + \sum_{j=1}^{|T|} old(i, j, k) \leq \{1 + Z_{hi}(i, k)\} \bullet \left\{ new(i, k-1) + \sum_{j=1}^{|T|} old(i, j, k-1) \right\} \end{aligned} \quad (S4)$$

$$\forall i \in N, k \in Y$$

$$136 \quad \{1 - G_{low}(i, k)\} \bullet new(i, k-1) \leq new(i, k) \leq \{1 + G_{hi}(i, k)\} \bullet new(i, k-1) \quad (S5)$$

137 Additionally, the total market share (and not change in total market share) of a given technology  
138 in a year can also be constrained as follows.

$$\forall i \in N_v, k \in Y$$

$$new_v(i, k) + \sum_{j=1}^{|T|} old_v(i, j, k) \leq MARKET\_SHARE(i, k) \bullet D_v(k)$$

$$\forall i \in N_e, k \in Y$$

$$\begin{aligned} 139 \quad & new_e(i, k) + \sum_{j=1}^{|T|} old_e(i, j, k) \leq MARKET\_SHARE(i, k) \bullet \left\{ \begin{aligned} & D_e(k) + \left[ \sum_{i \in N_v} \sum_{j=1}^{|T|} old_v(i, j, k) \bullet EN(i, j, k) \right] \\ & + \left[ \sum_{i \in N_v} new_v(i, k) \bullet EN(i, k) \right] \end{aligned} \right\} \end{aligned} \quad (S6)$$

141 In addition to these fleet constraints, the total new unit production capacity (for all  
142 technologies combined) in any given sector can also be restricted to simulate a gradual ramp up  
143 in capacity of new vehicles or electricity generation. For instance, this constraint can prevent the  
144 sales of 50% more vehicles (25 million) in year 1 of the analysis, which is unlikely to happen  
145 since the additional vehicle manufacturing facilities needed to meet this production increase  
146 cannot realistically be built in a year. It should be noted that the same effect can be achieved  
147 using the new unit deployment smoothing constraint, and restricting the total new unit

production capacity is just another way of restricting increase in deployment of new units. As such, the production constraint can be written as shown in Eq. (S7). We note here that in this paper, none of the market share, production, or deployment smoothing constraints have been applied in any scenario.

$$\forall k \in Y$$

$$\sum_{i \in N_v} new_v(i, k) \leq INITPROD_v \bullet PROD\_GROWTH_v(k)$$

$$\sum_{i \in N_e} new_e(i, k) \leq INITPROD_e \bullet PROD\_GROWTH_e(k) \quad (S7)$$

### Emission Constraints

Sector-wide emissions can be expressed as the sum of emissions from old units that have survived scrappage or forced retirement and the emission from new units. The emission constraints can then be expressed as an annual target for each year of the analysis horizon (Eq. (S8)), or as an aggregate constraint over the entire analysis horizon such that the total allowable emissions over a given period equal the sum of the annual emission targets over that same period (Eq. (S9)).

$$\forall k \in Y$$

$$\sum_{i \in N_s} new_s(i, k) \bullet e_{new}(i, k) + \sum_{i \in N_s} \sum_{j=1}^{|T|} old_s(i, j, k) \bullet e_{old}(i, j, k) \leq E_s(k) \quad (S8)$$

$$\sum_{k=1}^{|Y|} \left\{ \sum_{i \in N_s} new_s(i, k) \bullet E_{new}(i, k) + \sum_{i \in N_s} \sum_{j=1}^{|T|} old_s(i, j, k) \bullet e_{old}(i, j, k) \right\} \leq \sum_{k=1}^{|Y|} E_s(k) \quad (S9)$$

This model assumes a uniform rate of emission reduction from 2011 through 2050 to achieve a set reduction in GHGs relative to 1990 emission values. The time period of interest to us is until 2050. However, as discussed earlier, the analysis time horizon for both sectors goes well beyond

2050 to account for operating costs beyond 2050. The value of elements in the vector  $E$  for years beyond 2050 is held at the constant value of the 2050 target. Thus, elements of the  $E$  vector fall on a straight line with a slope of  $(E(2050) - E(2014)) / (2050 - 2014)$  until 2050, followed by a straight line with slope 0 beyond 2050.

The climate action scenario assumes that regulatory measures such as sector-wide emission targets, emission permits and trading schemes, or carbon tax will be put in place starting from the year in the climate action is initiated, and continuing through the year 2050 and beyond so as to reduce and maintain annual emission levels in 2050 and beyond to 71% of the 2010 values. The 71% CO<sub>2</sub> reduction value is chosen as the mean value of the 70% – 72% range for CO<sub>2</sub> reduction provided by the IPCC (IPCC, 2014). This emission “constraint” is implemented in two ways in this study depending on the analysis. The first approach treats 2010 as the baseline climate action year based on the IPCC AR5<sup>3</sup> report, and assumes a linear annual reduction in emissions through 2050 such that the annual sector-specific emission in 2050,  $E_{2050}$ , is  $1 - 0.71 = 0.29$  times the 2010 emission value,  $E_{2010}$ . The sum of the annual “ideal” emissions  $E_{ideal}$  (that is if climate action had initiated in 2010) from 2010 till the end of the analysis time horizon  $(2010 + |Y|)$ , minus the sum of the annual emission deficit accrued between 2010 and the climate action year  $y_{CA}$  (due deviation of actual emissions  $E_{actual}$  from the ideal emissions  $E_{ideal}$ ) is then treated as the emission budget  $B$  for the years between the climate action year  $y_{CA}$  and 2050. This can be expressed mathematically as follows.

$$B = \sum_{y=2010}^{2010+|Y|} E_{ideal}(y) - \sum_{y=2015}^{y_{CA}} \{E_{actual}(y) - E_{ideal}(y)\} \quad (S10)$$

where,

$$\forall y \in [2010, 2050]$$

$$E_{ideal}(y) = (y - 2010) \cdot \left\{ \frac{0.29 \cdot E_{2010} - E_{2010}}{2050 - 2010} \right\} + E_{2010}$$

186 *and*

$$\forall y \in [2051, 2010 + |Y|]$$

$$E_{ideal}(y) = (2050 - 2010) \cdot \left\{ \frac{0.29 \cdot E_{2010} - E_{2010}}{2050 - 2010} \right\} + E_{2010}$$

(S11)

187 Based on Eqs. (S10) and (S11), the emission budget constraint can be rewritten as shown in  
188 Eq. (S12).

$$189 \sum_{k=1}^{|Y|} \left\{ \sum_{i \in N_s} new_s(i, k) \cdot e_{new}(i, k) + \sum_{i \in N_s} \sum_{j=1}^{|T|} old_s(i, j, k) \cdot e_{old}(i, j, k) \right\} \leq B$$

(S12)

190

191 The second approach of implementing an emission constraint is by including the emissions in  
192 the objective function as a cost. This approach requires emissions to be ascribed a certain cost  
193 penalty, which is implemented in this analysis using estimates of social cost of carbon (SCC).  
194 Expressing emissions as costs eliminates the need to impose an emission budget constraint, and  
195 therefore, this approach is used when setting a specified  $p\%$  reduction in annual emissions by  
196 2050 leads to infeasibility in the optimization process. Further, the second approach can also be  
197 used to estimate the SCC required for achieving a certain emission reduction. Assuming that the  
198 SCC is imposed as a function of time, the objective function under the second approach can be  
199 written based on Eq. (S1) and Eq. (S12) as shown in Eq. (S13).

$$\begin{aligned}
& \min_{\substack{\text{new} \\ \text{old} \\ \text{ret}}} \sum_{k=1}^{|Y|} \left\{ \frac{\left\{ \sum_{i \in N} \text{new}(i, k) \bullet (c_{\text{new}}(i, k) + SCC(k) \bullet e_{\text{new}}(i, k)) \right\} + \left\{ \sum_{i \in N} \sum_{j=1}^{|T|} [\text{old}(i, j, k) \bullet (c_{\text{old}}(i, j, k) + SCC(k) \bullet e_{\text{old}}(i, j, k))] + [\text{ret}(i, j, k) \bullet c_{\text{ret}}(i, j, k)] \right\}}{(1+r)^{k-1}} \right\} \\
& \hspace{20em} (S13)
\end{aligned}$$

## Other Constraints

Corporate Average Fuel Economy (CAFE) standards for vehicle fuel economies beyond 2025 (the year until which they are presently defined) are assumed to continue to follow the linear trajectory through 2050 as set by CAFE standards in miles per gallon from 2011 – 2025, which is defined as shown in Eq. (S14). This equation has an  $R^2$  value of 0.991 considering the 2011 – 2025 CAFE standards.

$$CAFE(k) = 1.3704(k - 2010) + 26.077 \quad (S14)$$

If the *FUEL\_ECONOMY* denotes the sales-weighted fuel economy in miles per gallon of a new vehicle of technology  $i \in N_v$ , the CAFE constraint can be expressed as shown in Eq. (S15).

$$\sum_{i \in N_v} (\text{new}_v(i, k) \bullet FUEL\_ECONOMY(i, k)) \geq \left( \sum_{i \in N_v} \text{new}_v(i, k) \right) CAFE(k) \quad (S15)$$

Similarly, the renewable portfolio standards (RPS) constraint for the electric sector, which applied to generation from new and existing generators, can be expressed as shown in Eq. (S16). Here, *REN* is the set of renewable energy technologies, and *f* is the national average fraction of total generation that is mandated from renewables.

$$\sum_{i \in REN} (new_e(i,k) + old_e(i,k)) \geq f \bullet \sum_{i \in N_e} (new_e(i,k) + old_e(i,k)) \quad (S16)$$

## 217 Non-Negativity Bounds

218 Finally, the non-negativity bounds for the decision variables can be expressed as follows.

$$\begin{aligned} \forall i \in N, k \in Y \\ new(i,k) \geq 0 \end{aligned}$$

$$\begin{aligned} \forall i \in N, j \in T, k \in Y \\ old(i,j,k) \geq 0 \\ ret(i,j,k) \geq 0 \end{aligned} \quad (S17)$$

## 220 Uncertainty Analysis Scenarios

221 Table S1. Uncertainty analysis scenarios (27) defined by levels of different parameter groups.

222 For each parameter group, 1 = Low, 2 = Nominal, 3 = High.

| Scenario    | Cost Parameters | Emission Parameters | Demand Parameters |
|-------------|-----------------|---------------------|-------------------|
| Scenario 1  | 1               | 1                   | 1                 |
| Scenario 2  | 2               | 1                   | 1                 |
| Scenario 3  | 3               | 1                   | 1                 |
| Scenario 4  | 1               | 2                   | 1                 |
| Scenario 5  | 2               | 2                   | 1                 |
| Scenario 6  | 3               | 2                   | 1                 |
| Scenario 7  | 1               | 3                   | 1                 |
| Scenario 8  | 2               | 3                   | 1                 |
| Scenario 9  | 3               | 3                   | 1                 |
| Scenario 10 | 1               | 1                   | 2                 |
| Scenario 11 | 2               | 1                   | 2                 |
| Scenario 12 | 3               | 1                   | 2                 |
| Scenario 13 | 1               | 2                   | 2                 |
| Scenario 14 | 2               | 2                   | 2                 |
| Scenario 15 | 3               | 2                   | 2                 |
| Scenario 16 | 1               | 3                   | 2                 |
| Scenario 17 | 2               | 3                   | 2                 |

| Scenario    | Cost Parameters | Emission Parameters | Demand Parameters |
|-------------|-----------------|---------------------|-------------------|
| Scenario 18 | 3               | 3                   | 2                 |
| Scenario 19 | 1               | 1                   | 3                 |
| Scenario 20 | 2               | 1                   | 3                 |
| Scenario 21 | 3               | 1                   | 3                 |
| Scenario 22 | 1               | 2                   | 3                 |
| Scenario 23 | 2               | 2                   | 3                 |
| Scenario 24 | 3               | 2                   | 3                 |
| Scenario 25 | 1               | 3                   | 3                 |
| Scenario 26 | 2               | 3                   | 3                 |
| Scenario 27 | 3               | 3                   | 3                 |

## INPUTS, ASSUMPTIONS, AND OTHER DETAILS FOR THE AUTO SECTOR

### *Representative Vehicle Characteristics*

All vehicle segments such as compact, mid-size sedan, SUVs, and light trucks within each technology are treated as one representative vehicle that has a sales-weighted average fuel economy and price based on 2015 data from the U.S. Energy Information Administration (EIA).<sup>2</sup> Table S2 summarizes these fuel economy and price for the year 2015.

Table S2. Representative vehicle characteristics for the auto sector

| Representative Vehicle Type | Fuel Economy (MPG or MPGe) | Purchase Price (USD) |
|-----------------------------|----------------------------|----------------------|
| ICEV                        | 24.9                       | 28,020               |
| HEV                         | 49.1                       | 37,107               |
| BEV                         | 116.9                      | 60,655               |
| PHEV                        | 66.7                       | 40,306               |

### *Initial Condition for Stock and Flow Model*

New vehicles deployed in any given year make up for the number of vehicles scrapped that year plus the projected increase in the total number of vehicles over the previous year. The vehicle scrappage function is expressed as a logistic function of age of the form given by Eq.

(S18) based on Greene and Chen,<sup>4</sup> where  $t$  is the age of the vehicle and  $d(t)$  is the discard probability (scrappage probability) function.

$$d(t) = 1 / \{ A_0 + e^{-(A_1 + A_2 t)} \} \quad (S18)$$

The discard probability function is assumed to only be a function of vehicle age and not the year in which the vehicle was produced. Furthermore, it defines the probability that a vehicle of a certain age will be scrapped during its operation in the subsequent year. Using automotive sales values from 1990 to 2014 (see Fig. S2),<sup>5-7</sup> total vehicles on road in 2014,<sup>8</sup> and the total emissions from the auto sector in 2014.<sup>9</sup> The parameter coefficient  $A_0$  is expressed in terms of parameters  $A_1$ , and  $A_2$  as shown in Eq. (S19) using the initial condition that  $d(t)$  equal zero at  $t = 25$  years based on the assumed maximum service life of vehicles in this study as 25 years.

$$A_0 = 1 - e^{-(A_1 + 25A_2)} \quad (S19)$$

Parameters  $A_1$  and  $A_2$  are then determined using the Microsoft® Excel GRG non-linear solver. The solver changes the values of  $A_1$ , and  $A_2$ , and thus of  $d(t)$  such that the age distribution of the fleet so obtained minimizes the square of the error between reported and predicted number of total vehicles, and subject to the constraint that the error in reported and predicted values of total sector-wide GHG emissions is less than or equal to 1%. Due to the nonlinear nature of the objective function and constraint in  $A_1$ , and  $A_2$ , the optimization was run with 100 starting points of  $A_1$ , and  $A_2$ . The set of values of  $A_0$ ,  $A_1$ , and  $A_2$  that gave the lowest objective function value were selected as the global optimizers. The discard probability function is shown in Eq. (S20). Note that  $d(t)$  is the one-year survival probability, that is, conditional on having survived  $t$  years,  $d(t)$  gives the probability that the unit will survive until year  $t + 1$ .

256

$$d(t) = \frac{1}{0.9999 + e^{-(1.4635t - 19.4639)}}$$

(S20)

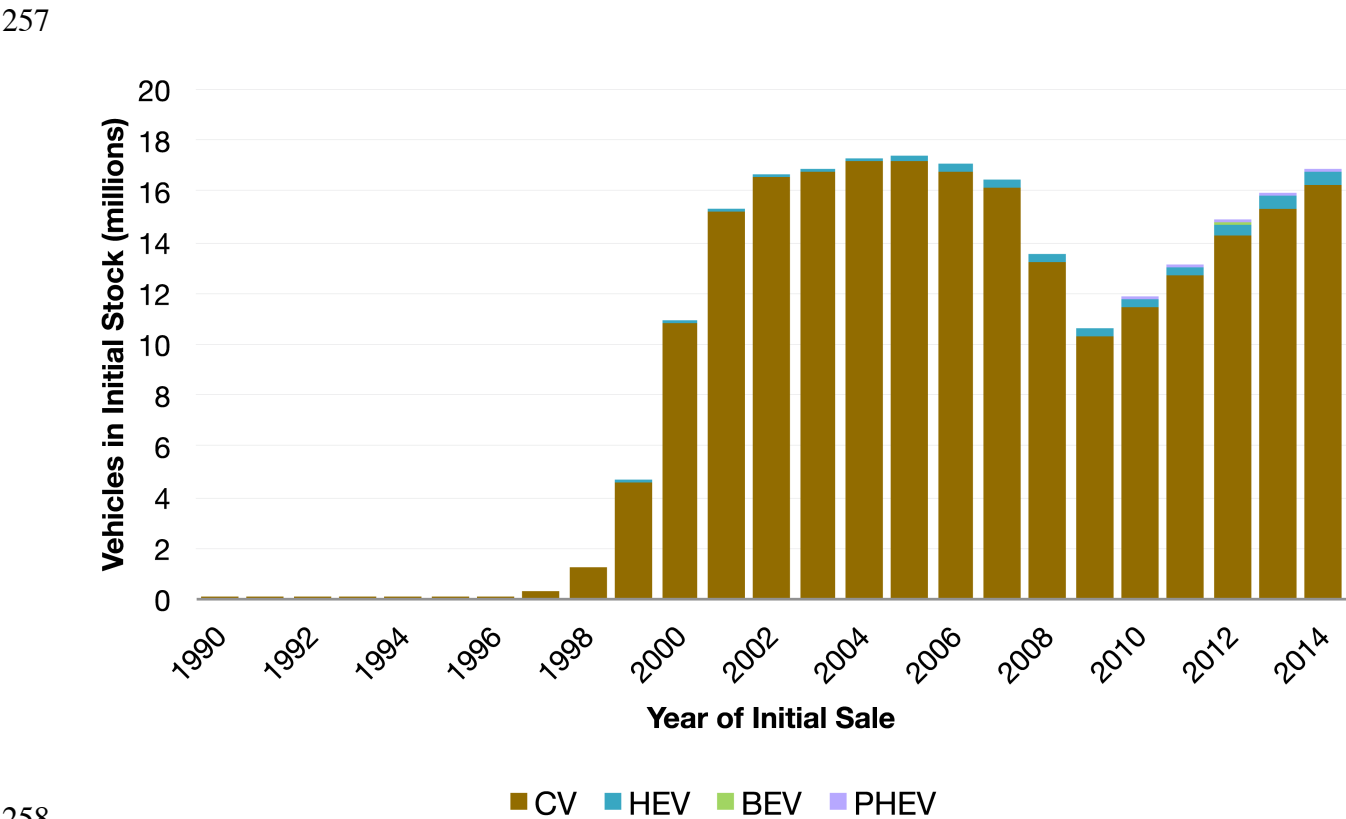

259

260

Fig. S2. Age-wise composition of initial (2014) vehicle stock for the auto sector stock and flow model based on vehicle sales data and discard probability calculated in Eq. (S20).

261

*Details on Input Parameters, Assumptions, and Data Sources*

262

Table S3. Auto sector model inputs, assumptions, and data sources

| Parameter                     | Values/Assumptions/Sources                                                                                                                                                                                    |
|-------------------------------|---------------------------------------------------------------------------------------------------------------------------------------------------------------------------------------------------------------|
| Gasoline vehicle fuel economy | ICEVs and PHEVs (gas driving) from 1990 to 2014 follow CAFE values; HEVs assumed to have 13% better mpg than CV; fuel economy improvement by model year based on estimates in the literature <sup>10-12</sup> |
| Electric vehicle fuel economy | MWh/miles assumed to improve at 0.5% annually after 2010 <sup>13</sup>                                                                                                                                        |
| Combined vehicle fuel economy | Formula for MPGe obtained from EPA rule ( $E_g/E_m \times E_e$ ) <sup>14</sup>                                                                                                                                |

| Parameter                                                      | Values/Assumptions/Sources                                                                                                                                                                       |
|----------------------------------------------------------------|--------------------------------------------------------------------------------------------------------------------------------------------------------------------------------------------------|
| CAFE fuel economy standards                                    | Years 1990-2025 follow CAFE standards that have been published so far; standards for 2026 and later calculated by linear extrapolation of 2008-2025 numbers <sup>15-18</sup>                     |
| New vehicle deployment costs                                   | Assumption based on sales-weighted average for vehicle type excluding subsidies in 2015 (see Table S2)                                                                                           |
| Vehicle maintenance cost                                       | Maintenance costs are assumed to be different for different vehicle technologies, and are assumed to stay constant with ageing <sup>19,20</sup>                                                  |
| Vehicle retirement costs                                       | Retirement cost assumed to be equal to the value of vehicle calculated using average annual depreciation rate based on literature <sup>21</sup>                                                  |
| Gasoline prices                                                | Gas prices assumed to follow EIA projections <sup>2</sup>                                                                                                                                        |
| Retail consumer electricity prices                             | Residential electricity price assumed to follow EIA projections <sup>2</sup>                                                                                                                     |
| Vehicle miles traveled on gasoline                             | Average miles traveled per vehicle calculated by dividing total VMT by projected total stock of vehicles by year based on EIA projections <sup>2</sup>                                           |
| Vehicle miles traveled on battery power                        | Miles on battery powered propulsion assumed to range between 50 – 70% of average miles traveled per vehicle for PHEVs                                                                            |
| Daily EV charging amount                                       | Calculated based on average daily miles traveled, battery capacity, and electric driving fuel economy of a vehicle as a function of time                                                         |
| CO2 emissions from burning fuel                                | Constant assuming gasoline as the fuel <sup>22</sup>                                                                                                                                             |
| CO2 emissions from wall charging of EVs and EV charging demand | Low, nominal, and high values for vehicle charging emissions factor and additional load from vehicle charging calculated by iteratively running the electric and auto sector optimization models |
| Battery cost reduction                                         | Rate at which batteries becomes cheaper assumed to follow non-exponential power curve based on literature data <sup>23-25</sup>                                                                  |
| Technology cost reduction                                      | Rate at which the technology becomes cheaper over the years (different from battery cost reduction which is in addition to this reduction) based on purchase price trends from EIA <sup>2</sup>  |
| Relative market penetration of PHEVs and BEVs                  | Expressed as a ratio of PHEV:BEV sales in every year and values are 1:2, 1:1, and 2:1 for the low, nominal, and high cases of PHEV penetration                                                   |
| Total vehicle stock (or demand)                                | Obtained from EIA estimates <sup>2</sup>                                                                                                                                                         |

The spreadsheet that serves as an input file for the LETSACT model for this study can be accessed using this link (<https://umich.box.com/s/c1ho8bgq13gj2d68b29szudrtb7fkr0r>). It contains specific values for the Low, Nom, and High cases of parameters described in Table S3.

## INPUTS, ASSUMPTIONS, AND OTHER DETAILS FOR THE ELECTRIC SECTOR

### *Initial Condition for Stock and Flow Model*

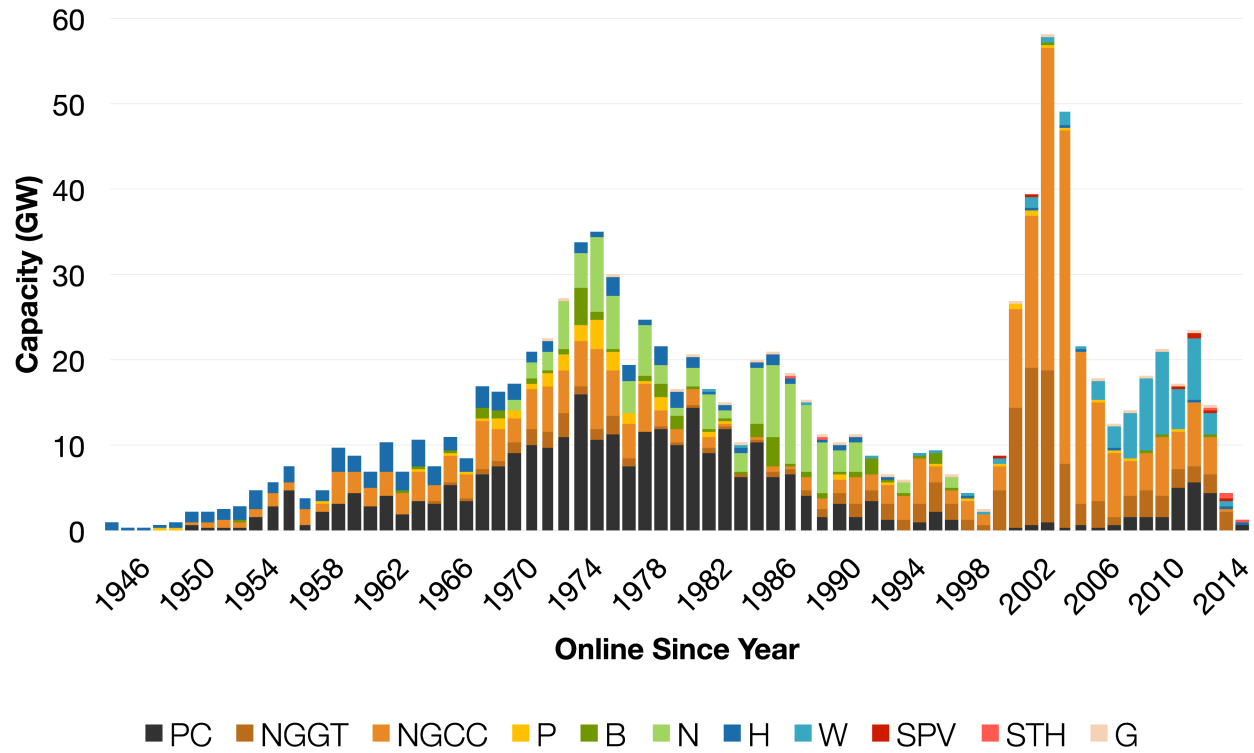

Fig. S3. Age-wise composition of initial (2014) power generation capacity for the electric sector stock and flow model based on NEEDS data.<sup>26</sup>

272 *Details on Input Parameters, Assumptions, and Data Sources*

273 Table S4. Electric sector model inputs, assumptions, and data sources

| Parameter                                            | Values/Assumptions/Sources                                                                                                                                                                                                                                                                                                                                                                                                                                  |
|------------------------------------------------------|-------------------------------------------------------------------------------------------------------------------------------------------------------------------------------------------------------------------------------------------------------------------------------------------------------------------------------------------------------------------------------------------------------------------------------------------------------------|
| Age-wise distribution of 2014 initial stock          | Installed capacity, generation, and generator age data obtained from eGRID and NEEDS data; Generation capacity older than 70 years, which comprised of only 3% of total capacity, is excluded from the fleet, but total generation and emission values are kept identical to actual reported values <sup>26–29</sup>                                                                                                                                        |
| Capacity discard probability                         | Assumed to be 0 until maximum service life of the technology, and 1 after that                                                                                                                                                                                                                                                                                                                                                                              |
| Maximum service life                                 | Assumed 60 years for PC, NGCC, N, and H; 40 years for NGGT, P, and G; and 30 years for the rest                                                                                                                                                                                                                                                                                                                                                             |
| Deployment & O&M costs, heat rates, emission factors | Based on EIA, NREL, and Lazard estimates; \$/kW converted to \$/MWh considering 2014 capacity factors <sup>30–32</sup>                                                                                                                                                                                                                                                                                                                                      |
| Capacity retirement cost                             | Decommissioning costs obtained for retirement of an entire plant using a certain type of fuel, and then divided by the nominal capacity of a plant using the particular fuel; forced retirement costs include decommissioning cost plus the payment for lost revenue, and any remaining debt; capital recovery factor includes ROI/interest rate (10–12%), risk (1–3%), and tax (5%), loan term for capital cost is assumed to be 20 years <sup>33–39</sup> |
| Heat rates                                           | Heat rates of plants in the initial stock condition are based on NEEDS data, and are different from heat rates of plants deployed by the model from 2015 onwards that are based on characteristics of new plants; Heat rate is assumed to deteriorate slightly (0.05% – 0.2%) with ageing of a plant                                                                                                                                                        |
| Fuel costs                                           | Fuel costs based on heating values of different kinds of generation units using the same fuel, and fuel prices; fuel prices obtained from EIA estimates <sup>2</sup>                                                                                                                                                                                                                                                                                        |
| Relative market penetration of different renewables  | To incorporate some effects renewable resource availability and its distribution over the entire U.S., we deploy new capacity of W, STH, SPV, and G added in proportion to the relative available capacity for each resource based on the literature; The W:STH:SPV:G ratio is 1:0.1:0.1:0.03 in the low case, 1:0.25:0.25:0.03 in the nominal case, and 1:0.5:0.5:0.03 in the high case <sup>40,41</sup>                                                   |

The spreadsheet that serves as an input file for the LETSACT model for this study can be accessed using this link (<https://umich.box.com/s/c1ho8bgq13gj2d68b29szudrtb7fkr0r>). It contains specific values for the Low, Nom, and High cases of parameters described in Table S4.

## **TECHNOLOGY TRAJECTORIES FOR NOMINAL SCENARIO**

Technology trajectories for immediate climate action (2018) and their BAU cases for both sectors in the nominal scenario where cost, emission, and demand parameters assume their nominal value are shown in Fig. S4 and Fig. S5 respectively. Since no market share, deployment smoothing, or production constraints have been imposed in this idealized analysis of technology trajectories, we observe abrupt switches from one technology to the other. Imposition of market share and other such reality-based constraints would lead to smoother transitions that would also cause emission lock-ins, thereby further increase abatement costs and shrinking the window of tie within which climate action would still be feasible. Spreadsheets containing technology trajectories for all scenarios and for different climate action start years within each scenario can be obtained using this link (<https://umich.box.com/s/8xdtv5dfew27reh98mv20qzyvjp41gnh>) for the auto sector, and this link (<https://umich.box.com/s/betvhqmmmqf5p3s0rtn1a5gr2vbsmv3cx>) for the electric sector. Differences between least-cost BAU emissions and BAU projections from the U.S. EIA are shown in Fig. S6.

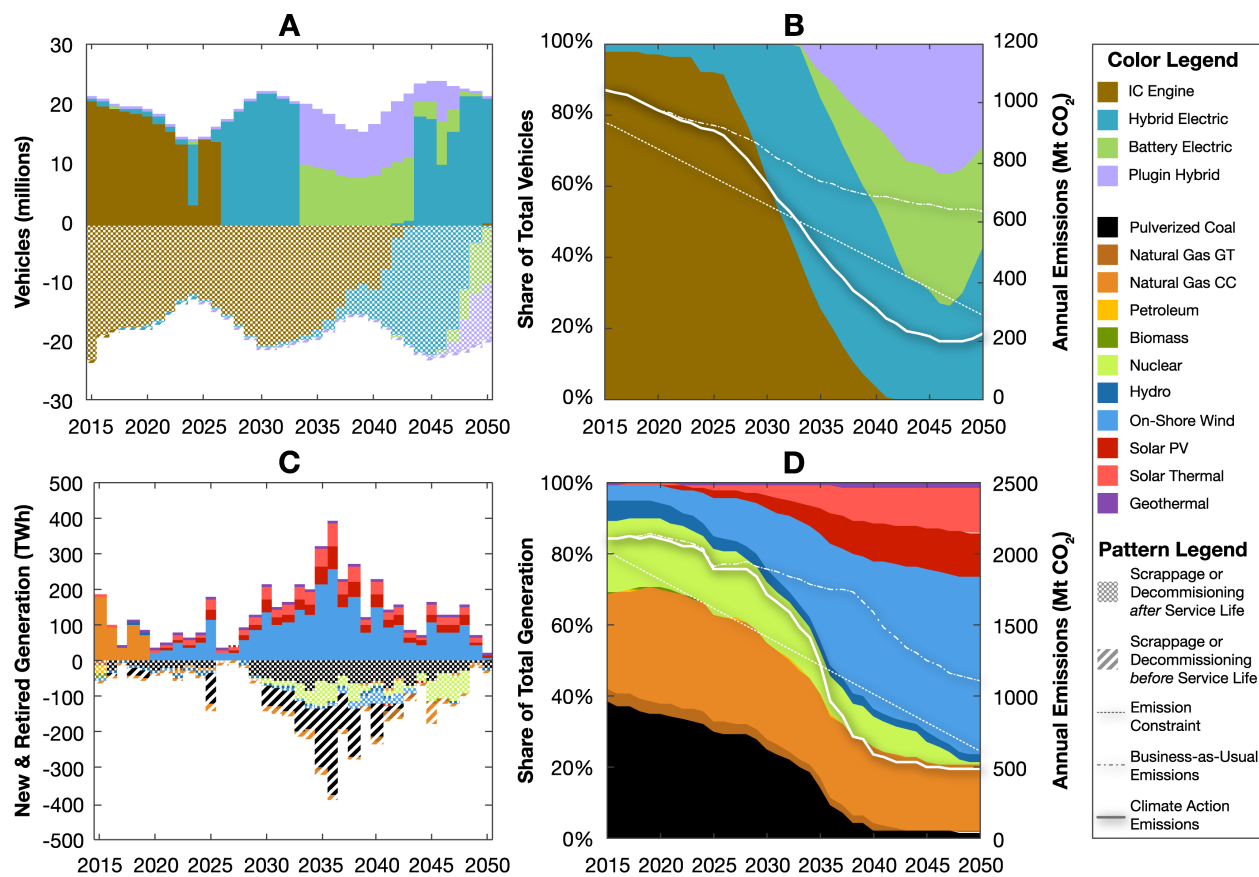

Fig. S4. Ideal least-cost trajectories under climate action starting in 2018 for the nominal cost, emissions, and demand scenario. (A) and (C) show new vehicle sales and new capacity addition respectively for the auto and electric sectors, and total stock trajectories for the two sectors are shown in (B) and (D).

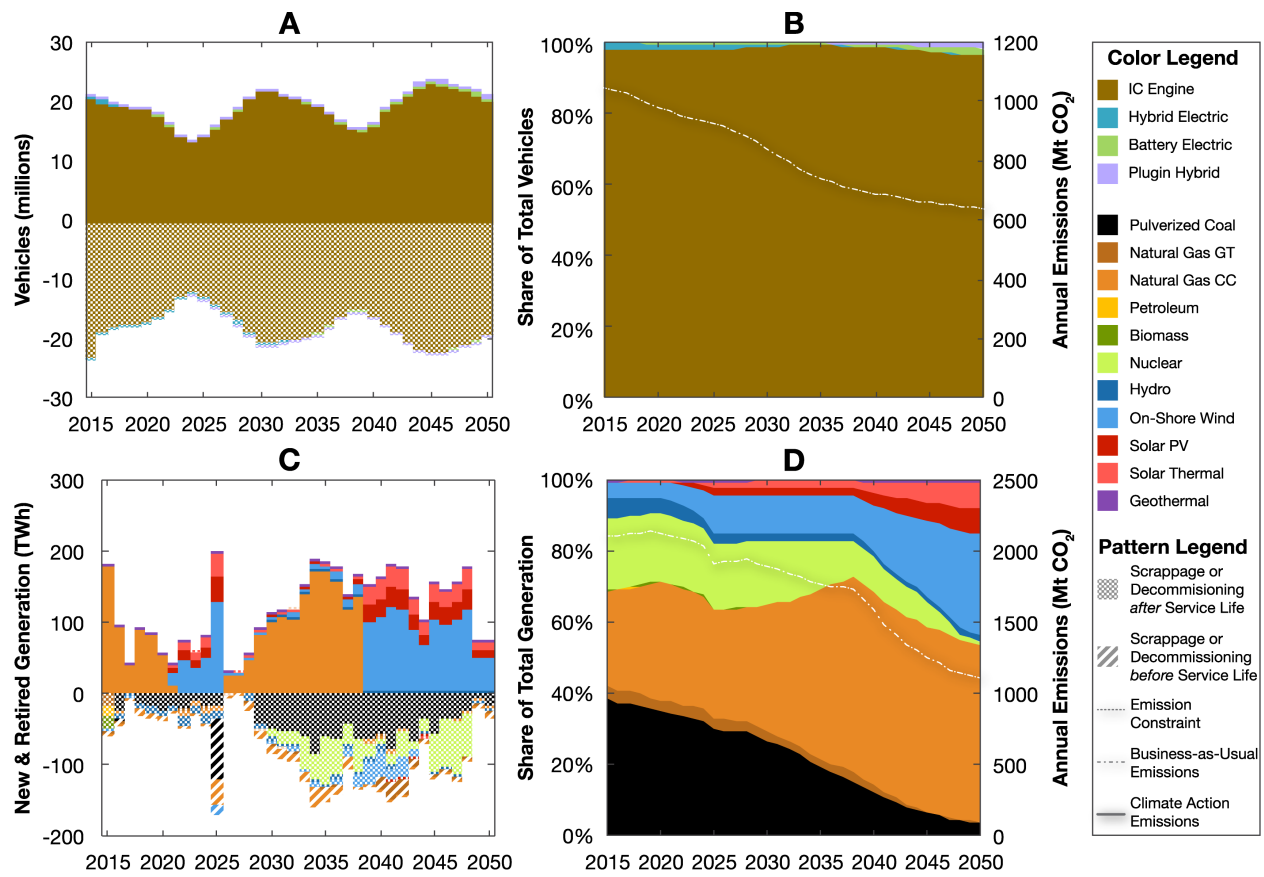

299

300 Fig. S5. Ideal least-cost trajectories under business as usual case for the nominal cost, emissions,  
 301 and demand scenario. (A) and (C) show new vehicle sales and new capacity addition  
 302 respectively for the auto and electric sectors, and total stock trajectories for the two sectors  
 303 are shown in (B) and (D).

304

305

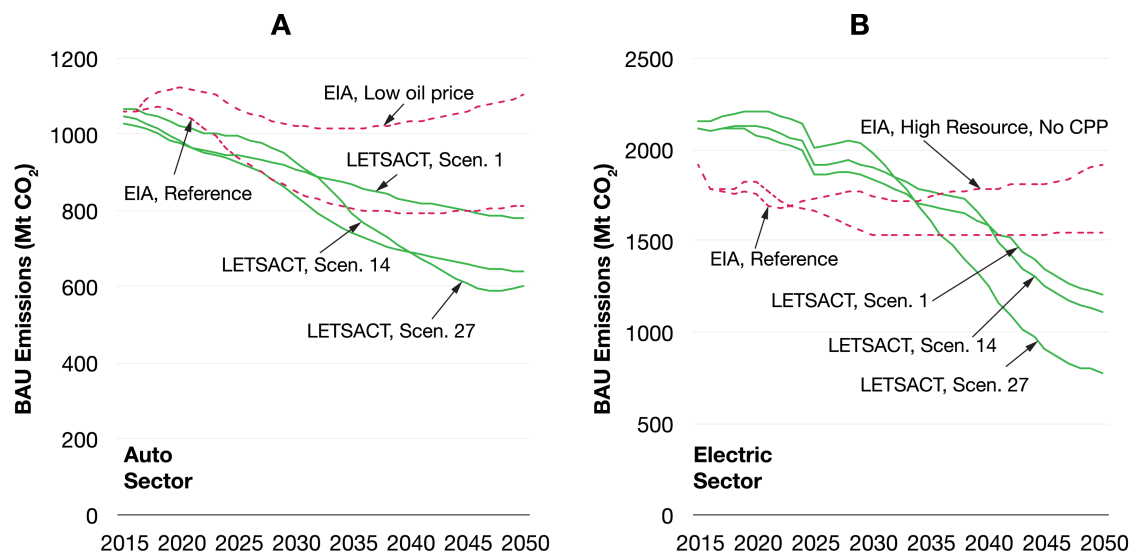

306

307 Fig. S6. Comparison of business-as-usual (BAU) emission trajectories obtained using the  
 308 LETSACT model (solid green) with BAU emission trajectories projected in EIA's 2017 Annual  
 309 Energy Outlook<sup>42</sup> (dashed red). Note that the initial difference of about 300 – 350 Mt CO<sub>2</sub> in the  
 310 utility sector emissions between LETSACT results and the EIA reported values is because the  
 311 LETSACT model includes emissions from combined heat and power plants as well.

## REFERENCES

- (1) *Inventory of U.S. Greenhouse Gas Emissions and Sinks: 1990-2011*; U.S. Environmental Protection Agency.; U.S. Environmental Protection Agency: Washington, DC, 2013; <http://www.epa.gov/climatechange/Downloads/ghgemissions/US-GHG-Inventory-2013-Main-Text.pdf>.
- (2) *Annual Energy Outlook 2015 with projections to 2040*; U.S. Energy Information Administration.; Washington, DC, 2015; [http://www.eia.gov/forecasts/aeo/pdf/0383\(2015\).pdf](http://www.eia.gov/forecasts/aeo/pdf/0383(2015).pdf).
- (3) IPCC. *Climate Change 2014: Synthesis Report*; Core Writing Team; Pachauri, R. K.; Meyer, L., Eds.; IPCC: Geneva, Switzerland, 2014.
- (4) Greene, D. L.; Chen, C. K. E. Scrappage and survival rates of passenger cars and light trucks in the U.S., 1966–1977. *Transp. Res. Part A Gen.* **1981**, *15* (5), 383–389; DOI 10.1016/0191-2607(81)90144-8.
- (5) *U.S. Car and Truck Sales, 1931-2015*; Wards Auto.; 2016; <http://wardsauto.com/datasheet/us-car-and-truck-sales-1931-2014>.
- (6) U.S. HEV Sales by Model; <http://www.afdc.energy.gov/data/>.
- (7) U.S. Plug-in Electric Vehicle Sales by Model; <http://www.afdc.energy.gov/data/>.
- (8) *Forecasts of Vehicle Miles Traveled (VMT): May 2015*; U.S. Federal Highway Administration.; Washington, DC, 2015; [https://www.fhwa.dot.gov/policyinformation/tables/vmt/vmt\\_forecast\\_sum.pdf](https://www.fhwa.dot.gov/policyinformation/tables/vmt/vmt_forecast_sum.pdf).
- (9) *Inventory of U.S. Greenhouse Gas Emissions and Sinks: 1990 – 2014*; U.S. Environmental Protection Agency.; Washington, DC, 2016; <https://www3.epa.gov/climatechange/Downloads/ghgemissions/US-GHG-Inventory-2016-Main-Text.pdf>.
- (10) *Roads toward a low-carbon future: Reducing CO2 emissions from passenger vehicles in the global road transportation system*; McKinsey & Company.; New York, NY, 2009.
- (11) *Support for the revision of Regulation (EC) No 443 / 2009 on CO2 emissions from cars*; TNO; AEA; CE Delft; Ökopol; TML; Ricardo; IHS Global Insight.; Delft, The Netherlands, 2011.
- (12) *Summary of the EU cost curve development methodology*; 2012–5; Meszler, A. D.; German, J.; Mock, P.; Bandivadekar, A.; Washington, DC, 2012.
- (13) [fueleconomy.gov](http://fueleconomy.gov).
- (14) *Electric and Hybrid Vehicle Research, Development, and Demonstration Program; Petroleum-Equivalent Fuel Economy Calculation*; U.S. Department of Energy.; Washington, DC, 2000; <http://www.gpo.gov/fdsys/pkg/FR-2000-06-12/pdf/00-14446.pdf>.

- 347 (15) *Light-Duty Vehicle Greenhouse Gas Emission Standards and Corporate Average Fuel*  
348 *Economy Standards; Final Rule*; U.S. Environmental Protection Agency; U.S.  
349 Department of Transportation (NHTSA).; Washington, DC, 2010;  
350 [http://www.nhtsa.gov/staticfiles/rulemaking/pdf/cafe/CAFE-GHG\\_MY\\_2012-](http://www.nhtsa.gov/staticfiles/rulemaking/pdf/cafe/CAFE-GHG_MY_2012-2016_Final_Rule_FR.pdf)  
351 [2016\\_Final\\_Rule\\_FR.pdf](http://www.nhtsa.gov/staticfiles/rulemaking/pdf/cafe/CAFE-GHG_MY_2012-2016_Final_Rule_FR.pdf).
- 352 (16) *2017 and Later Model Year Light-Duty Vehicle Greenhouse Gas Emissions and*  
353 *Corporate Average Fuel Economy Standards*; U.S. Environmental Protection Agency;  
354 U.S. Department of Transportation (NHTSA).; Washington, DC, 2012;  
355 [http://www.nhtsa.gov/staticfiles/rulemaking/pdf/cafe/2017-25\\_CAFE\\_Final\\_Rule.pdf](http://www.nhtsa.gov/staticfiles/rulemaking/pdf/cafe/2017-25_CAFE_Final_Rule.pdf).
- 356 (17) *Summary of Fuel Economy Performance*; U.S. Department of Transportation (NHTSA).;  
357 Washington D.C., 2011.
- 358 (18) *Light-Duty Automotive Technology, Carbon Dioxide Emissions, and Fuel Economy*  
359 *Trends: 1975 Through 2016*; U.S. Environmental Protection Agency.; Washington, DC,  
360 2016; <https://www.epa.gov/sites/production/files/2016-11/documents/420r16010.pdf>.
- 361 (19) Vehicle Cost Calculator Assumptions and Methodology;  
362 [http://www.afdc.energy.gov/calc/cost\\_calculator\\_methodology.html](http://www.afdc.energy.gov/calc/cost_calculator_methodology.html).
- 363 (20) NewsRoom: Annual Cost to Own and Operate a Vehicle Falls to \$8,698;  
364 [http://newsroom.aaa.com/2015/04/annual-cost-operate-vehicle-falls-8698-finds-aaa-](http://newsroom.aaa.com/2015/04/annual-cost-operate-vehicle-falls-8698-finds-aaa-archive/)  
365 [archive/](http://newsroom.aaa.com/2015/04/annual-cost-operate-vehicle-falls-8698-finds-aaa-archive/).
- 366 (21) *ADAC Autokosten 2014*; Allgemeiner Deutscher Automobil-Club e.v.; Munich, Germany,  
367 2014.
- 368 (22) How much carbon dioxide is produced by burning gasoline and diesel fuel?;  
369 <http://www.eia.gov/tools/faqs/faq.cfm?id=307&t=11>.
- 370 (23) *Electrifying cars: How three industries will evolve*; Hensley, R.; Knupfer, S.; Pinner, D.;  
371 Detroit, MI, 2009.
- 372 (24) *Powertrain 2020 – The Future Drives Electric*; Valentine-urbschat, M.; Bernhart, W.;  
373 Munich, Germany, 2009.
- 374 (25) The Price of Batteries; [http://www.technologyreview.com/files/49959/Jan11\\_Feature](http://www.technologyreview.com/files/49959/Jan11_Feature_Electric_Cars_p61.pdf)  
375 [Electric Cars p61.pdf](http://www.technologyreview.com/files/49959/Jan11_Feature_Electric_Cars_p61.pdf).
- 376 (26) *National Electric Energy Data System (NEEDS) v.5.14*; U.S. Environmental Protection  
377 Agency.; Washington, DC, 2015; [https://www.epa.gov/sites/production/files/2015-](https://www.epa.gov/sites/production/files/2015-08/needs_v514.xlsx)  
378 [08/needs\\_v514.xlsx](https://www.epa.gov/sites/production/files/2015-08/needs_v514.xlsx).
- 379 (27) Year 2010 eGRID 9th edition Version 1.0.
- 380 (28) Net Generation by Energy Source: Electric Utilities, 2001 - 2012.
- 381 (29) Net Generation from Renewable Sources: Electric Utilities, 2002 - 2012.

- 382 (30) *Cost Report: Cost and Performance Data for Power Generation Technologies*; Black &  
383 Veatch.; 2012; <http://bv.com/docs/reports-studies/nrel-cost-report.pdf>.
- 384 (31) *Updated Capital Cost Estimates for Utility Scale Electricity Generating Plants*; U.S.  
385 Energy Information Administration.; Washington, DC, 2013;  
386 [http://www.eia.gov/forecasts/capitalcost/pdf/updated\\_capcost.pdf](http://www.eia.gov/forecasts/capitalcost/pdf/updated_capcost.pdf).
- 387 (32) Lazard's Levelised Cost of Energy Analysis (version 10.0);  
388 <https://www.lazard.com/media/438038/levelized-cost-of-energy-v100.pdf>.
- 389 (33) Power Plant Economics;  
390 [https://wpweb2.tepper.cmu.edu/ceic/SeminarPDFs/Carl\\_Bozzuto\\_Seminar.pdf](https://wpweb2.tepper.cmu.edu/ceic/SeminarPDFs/Carl_Bozzuto_Seminar.pdf).
- 391 (34) Peppiatt, S. Introduction to Power Station Project Financing. *Berkeley J. Int. Law* **2012**, 13  
392 (1).
- 393 (35) *Decommissioning Obsolete Power Plants: WHY DO IT NOW?*; Malley, E.; Zarider, D.;  
394 Lowell, MA, 2012; [http://www.trcsolutions.com/Documents/White](http://www.trcsolutions.com/Documents/WhitePapers/Decommissioning_Obsolete_Power_Plants_TRC_Ed_Malley_David_Zarider.pdf)  
395 [Papers/Decommissioning\\_Obsolete\\_Power\\_Plants\\_TRC\\_Ed\\_Malley\\_David\\_Zarider.pdf](http://www.trcsolutions.com/Documents/WhitePapers/Decommissioning_Obsolete_Power_Plants_TRC_Ed_Malley_David_Zarider.pdf).
- 396 (36) Board Votes Unanimously to Decommission Hydro Plant at Possum Kingdom Lake;  
397 [http://www.brazos.org/generalPdf/47ZEE\\_Decommissioning.pdf](http://www.brazos.org/generalPdf/47ZEE_Decommissioning.pdf).
- 398 (37) Decommissioning of Nuclear Facilities;  
399 <https://www.nrc.gov/waste/decommissioning.html>.
- 400 (38) Wind Decommissioning Costs - Lessons Learned; [https://www.wind-](https://www.wind-watch.org/documents/wind-decommissioning-costs-lessons-learned/)  
401 [watch.org/documents/wind-decommissioning-costs-lessons-learned/](https://www.wind-watch.org/documents/wind-decommissioning-costs-lessons-learned/).
- 402 (39) *Decommissioning Plan - Fleshman/Kost Road 3 MW Solar Farm*; Belectric.; Sacramento,  
403 CA, 2011; [www.planningdocuments.saccounty.net/DocOpen.aspx?PDCID=13854](http://www.planningdocuments.saccounty.net/DocOpen.aspx?PDCID=13854).
- 404 (40) Jacobson, M. Z.; Delucchi, M. a. Providing all global energy with wind, water, and solar  
405 power, Part I: Technologies, energy resources, quantities and areas of infrastructure, and  
406 materials. *Energy Policy* **2011**, 39 (3), 1154–1169; DOI 10.1016/j.enpol.2010.11.040.
- 407 (41) MacDonald, A. E.; Clack, C. T. M.; Alexander, A.; Dunbar, A.; Wilczak, J.; Xie, Y.  
408 Future cost-competitive electricity systems and their impact on US CO2 emissions. *Nat.*  
409 *Clim. Chang.* **2016**, (January), 1–6; DOI 10.1038/nclimate2921.
- 410 (42) *Annual Energy Outlook 2017*; U.S. Energy Information Administration.; NULL:  
411 Washington, DC, 2017; [http://www.eia.gov/outlooks/aeo/pdf/0383\(2017\).pdf](http://www.eia.gov/outlooks/aeo/pdf/0383(2017).pdf).

412
